# Supplementary material for: Machine Learning-Based Blood RNA Signature for Diagnosis of Autism Spectrum Disorder
Source: MDPI journal article supplement (doi:10.3390/ijms24032082), 2023-01-20

Supplementary materials for:

# Machine Learning-Based Blood RNA Signature for Diagnosis of Autism Spectrum Disorder

Irena Voinsky <sup>1</sup>, Oleg Y. Fridland <sup>2</sup>, Adi Aran <sup>3,4</sup>, Richard E. Frye <sup>5,6,\*</sup> and David Gurwitz <sup>1,7,\*</sup>

<sup>1</sup> Department of Human Molecular Genetics and Biochemistry, Faculty of Medicine, Tel Aviv University, Tel Aviv 69978, Israel; irenavoinsky@mail.tau.ac.il

<sup>2</sup> Independent Researcher, Tel Aviv 69978, Israel; olegfrid@post.bgu.ac.il

<sup>3</sup> Shaare Zedek Medical Center, Jerusalem 91031, Israel; aaran@szmc.org.il

<sup>4</sup> Obesity and Metabolism Laboratory, Institute for Drug Research, School of Pharmacy, Faculty of Medicine, The Hebrew University of Jerusalem, Jerusalem 91240, Israel

<sup>5</sup> Autism Discovery and Treatment Foundation, Phoenix, AZ 85050, USA

<sup>6</sup> Rossignol Medical Center, Phoenix, AZ 85050, USA

<sup>7</sup> Sagol School of Neuroscience, Tel Aviv University, Tel Aviv 69978, Israel

\* Correspondence: drfrye@rossignolmedicalcenter.com or drfrye@autismdiscovery.org (R.E.F.); gurwitz@tauex.tau.ac.il (D.G.)

**Supplementary Table S1: Pearson r correlation of studied genes expression ( $2^{-\Delta Ct}$ ).** The number of XY Pairs=101. Correlation in bold represent chosen genes combinations for ML testing ( $r>0.3$ ,  $*p\leq 0.05$ ).  
\* $P\leq 0.05$ , \*\* $P\leq 0.01$ , \*\*\* $P\leq 0.001$ , \*\*\*\* $P\leq 0.0001$ .

| Gene             | <i>BATF2</i>                                                    | <i>MT2A</i>                                                         | <i>ISG15</i>                                                    | <i>LY6E</i>                                                         |
|------------------|-----------------------------------------------------------------|---------------------------------------------------------------------|-----------------------------------------------------------------|---------------------------------------------------------------------|
| <i>SERPING1</i>  | <b><math>r=0.3030</math></b><br><b>**<math>p=0.0021</math></b>  | <b><math>r=0.4525</math></b><br><b>****<math>p&lt;0.0001</math></b> | $r=0.2948$<br><b>**<math>p=0.0028</math></b>                    | $r=-0.1348$<br>$p=0.1791$                                           |
| <i>BATF2</i>     |                                                                 | <b><math>r=0.3303</math></b><br><b>***<math>p=0.0007</math></b>     | $r=0.09726$<br>$p=0.3332$                                       | $r=0.2832$<br><b>**<math>p=0.0041</math></b>                        |
| <i>EFHC2</i>     | $r=-0.006877$<br>$p=0.9456$                                     | $r=-0.1668$<br>$p=0.0956$                                           | $r=0.007879$<br>$p=0.9377$                                      | $r=-0.1816$<br>$p=0.0692$                                           |
| <i>FCGR1A</i>    | $r=0.2766$<br><b>**<math>p=0.0051</math></b>                    | $r=0.1139$<br>$p=0.2567$                                            | $r=0.2377$<br><b>*<math>p=0.0167</math></b>                     | $r=-0.1737$<br>$p=0.0824$                                           |
| <i>CDC20</i>     | $r=0.2495$<br><b>*<math>p=0.0119</math></b>                     | $r=0.02850$<br>$p=0.7772$                                           | $r=0.09243$<br>$p=0.3579$                                       | $r=-0.1396$<br>$p=0.1639$                                           |
| <i>MT2A</i>      | <b><math>r=0.3303</math></b><br><b>***<math>p=0.0007</math></b> |                                                                     | <b><math>r=0.3126</math></b><br><b>**<math>p=0.0015</math></b>  | $r=0.009802$<br>$p=0.9225$                                          |
| <i>ISG15</i>     | $r=-0.006877$<br>$p=0.9456$                                     | <b><math>r=0.3126</math></b><br><b>**<math>p=0.0015</math></b>      |                                                                 | $r=0.1379$<br>$p=0.1692$                                            |
| <i>FBXO6</i>     | <b><math>r=0.3134</math></b><br><b>**<math>p=0.0014</math></b>  | <b><math>r=0.3884</math></b><br><b>****<math>p&lt;0.0001</math></b> | <b><math>r=0.3618</math></b><br><b>***<math>p=0.0002</math></b> | <b><math>r=0.4343</math></b><br><b>****<math>p&lt;0.0001</math></b> |
| <i>LINC00869</i> | $r=-0.03090$<br>$p=0.7590$                                      | $r=0.1456$<br>$p=0.1463$                                            | $r=0.1852$<br>$p=0.0637$                                        | $r=0.006298$<br>$p=0.9502$                                          |
| <i>LY6E</i>      | $r=0.2832$                                                      | $r=0.009802$                                                        | $r=0.1379$                                                      |                                                                     |

|  |            |          |          |  |
|--|------------|----------|----------|--|
|  | **p=0.0041 | p=0.9225 | p=0.1692 |  |
|--|------------|----------|----------|--|

**Supplementary Figure S1: Feature importance using the Random Forest Classifier.** The bars represent the feature importance of the “forest”, and standard deviation error bars represent the inter-trees variability. See Methods 2.3 for further details.

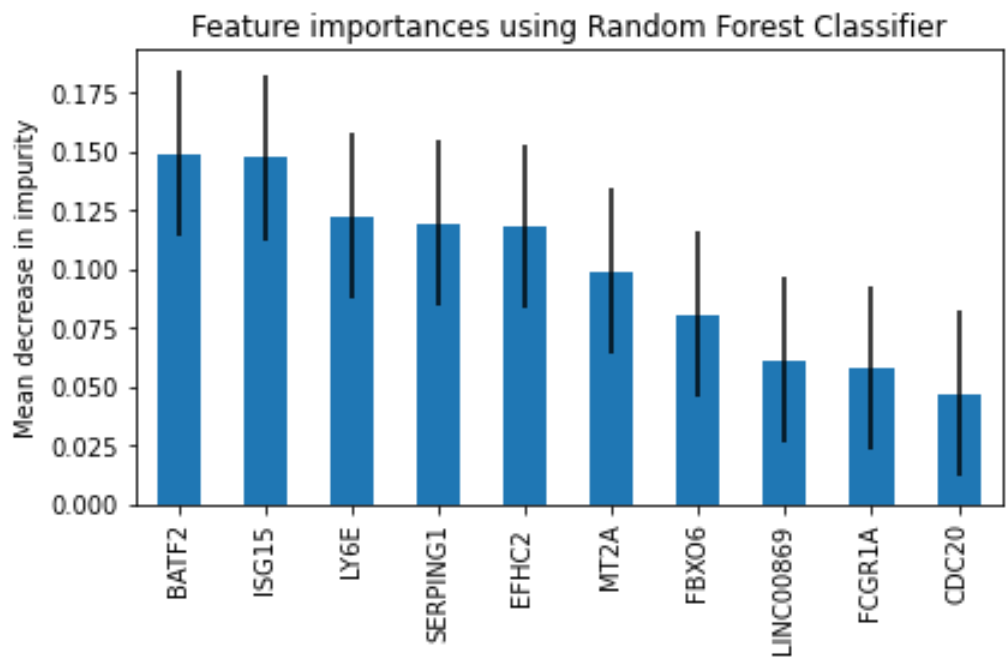

Supplement: s1 [file s1]
